# Supplementary material
Source: PubMed Central journal article supplement (PMC7501875)
Supplement: mmc1.pdf [file mmc1.pdf]

**Figure S1. Trajectories of other laboratory values in the first 14 days after ICU admission**

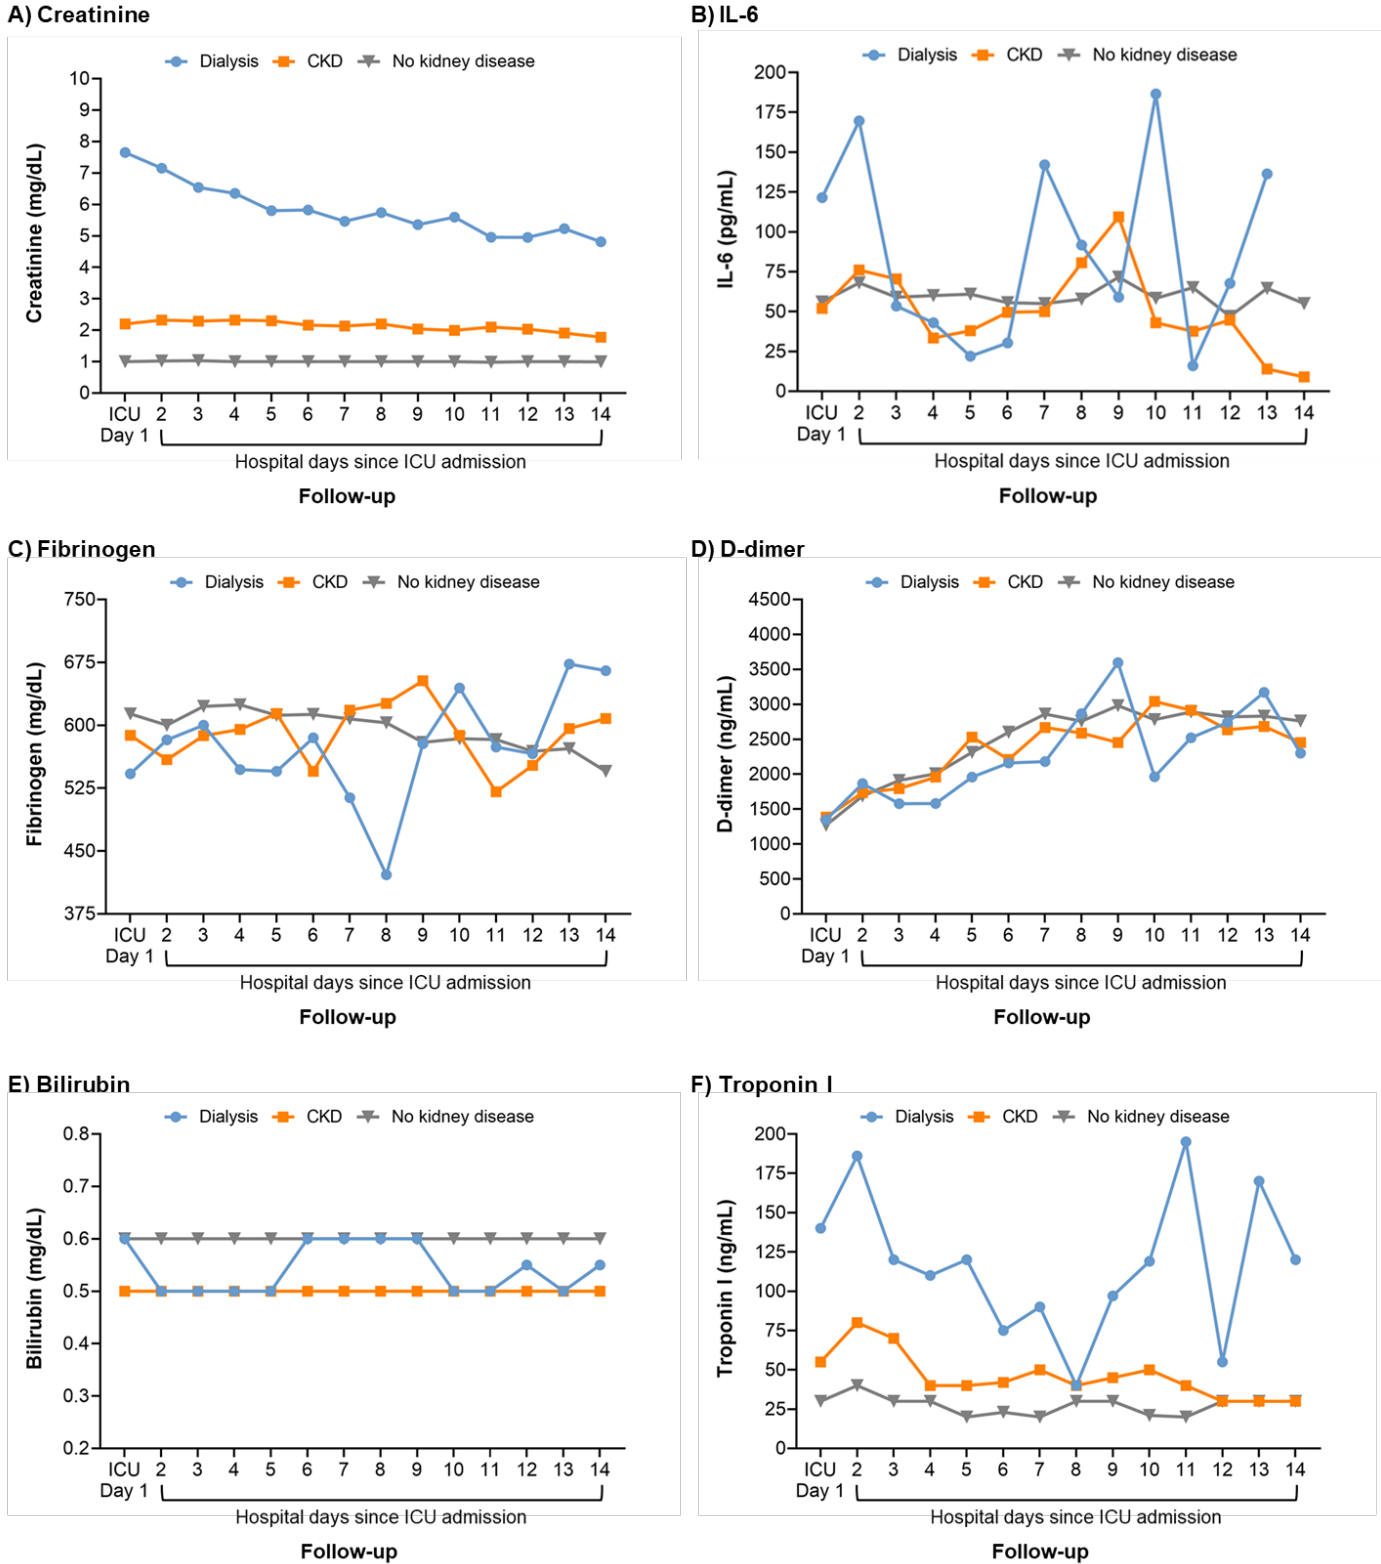

Values presented in the figure are medians. Dialysis represents patients with pre-existing kidney failure receiving maintenance dialysis. CKD represents patients with pre-existing non-dialysis dependent CKD. No kidney disease represents patients without pre-existing CKD.

Abbreviations: CKD, chronic kidney disease; ICU, intensive care unit; IL, interleukin.

**Figure S2. Contributing cause(s) of death**

**A) Deaths occurring within 14 days of ICU admission**

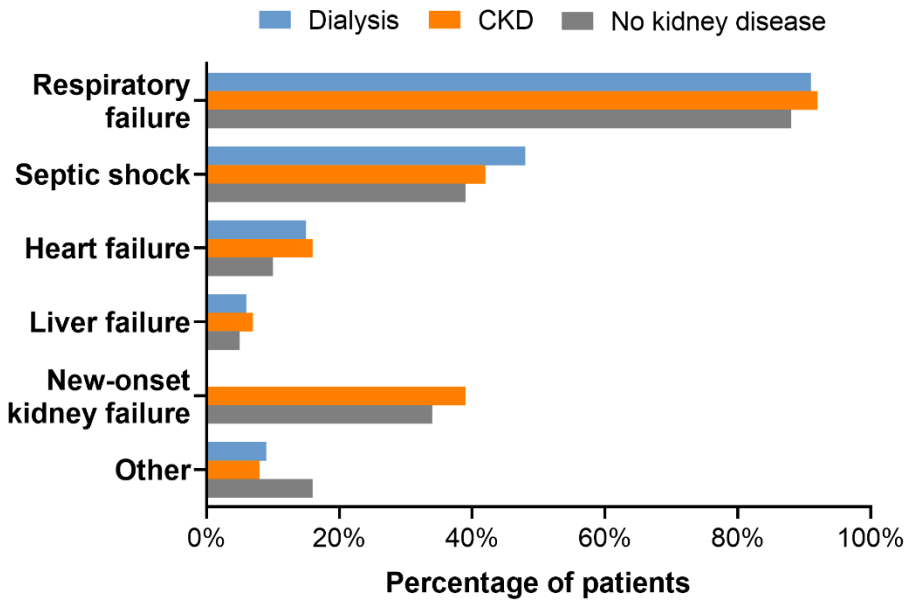

**B) Deaths occurring within 28 days of ICU admission**

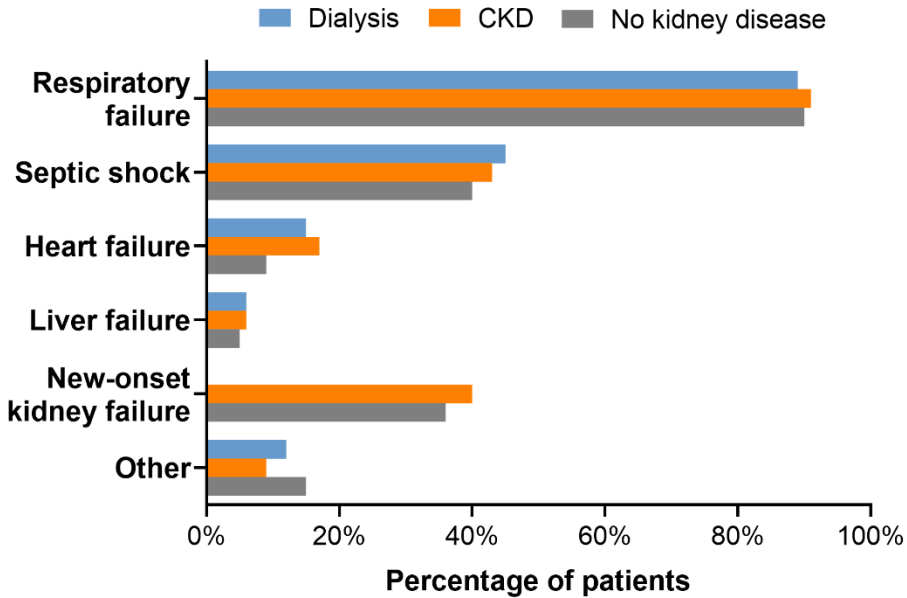

Dialysis represents patients with pre-existing kidney failure receiving maintenance dialysis. CKD represents patients with pre-existing non-dialysis dependent CKD. No kidney disease represents patients without pre-existing CKD. Patients could have more than one contributing cause of death documented in their medical record.

Abbreviations: CKD, chronic kidney disease; ICU, intensive care unit.

**Item S1. List of participating STOP-COVID sites**

**Northeastern United States**

Beth Israel Deaconess Medical Center  
Brigham and Women's Faulkner Hospital  
Brigham and Women's Hospital  
Cooper University Health Care  
Hackensack Meridian Health Hackensack University Medical Center  
Hackensack Mountainside Hospital  
Johns Hopkins Hospital  
Kings County Hospital Center  
Lowell General Hospital  
Massachusetts General Hospital  
MedStar Georgetown University Hospital  
Montefiore Medical Center  
Mount Sinai  
Newton Wellesley Hospital  
New York-Presbyterian Queens Hospital  
New York-Presbyterian/Weill Cornell Medical Center  
New York University Langone Hospital  
Rutgers/New Jersey Medical School  
Rutgers/Robert Wood Johnson Medical School  
Temple University Hospital  
Thomas Jefferson University Hospital  
Tufts Medical Center  
United Health Services Hospitals  
University of Pennsylvania Health System  
University of Pittsburgh Medical Center  
Westchester Medical Center  
Yale University Medical Center

**Southern United States**

Baylor College of Medicine, Houston  
Baylor University Medical Center/Baylor Scott White and Health  
Duke University Medical Center  
Mayo Clinic, Florida  
Memphis VA Medical Center  
Methodist University Hospital  
Ochsner Medical Center  
Tulane Medical Center  
University of Alabama-Birmingham Hospital  
University of Florida Health-Gainesville  
University of Florida Health-Jacksonville  
University of Miami Health System  
University of North Carolina Hospitals  
University of Texas Southwestern Medical Center  
University of Virginia Health System

**Midwestern United States**

Barnes-Jewish Hospital  
Cook County Health  
Froedtert Hospital  
Indiana University Health Methodist Hospital  
Mayo Clinic, Saint Mary's Campus, Minnesota  
Northwestern Memorial Hospital  
Promedica Health System  
Rush University Medical Center

University Hospitals Cleveland Medical Center  
University of Chicago Medical Center  
University of Illinois Hospital and Health Sciences System  
University of Kentucky Hospital  
University of Michigan Hospital  
University of Oklahoma Health Sciences Center

**Western United States**

Loma Linda University Medical Center  
Mayo Clinic, Arizona  
Oregon Health and Science University Hospital  
Renown Health  
Stanford Healthcare  
University of California-Davis Medical Center  
University of California-Los Angeles Medical Center  
University of California-San Diego Medical Center  
University of California-San Francisco Medical Center  
UC Health University of Colorado  
University Medical Center of Southern Nevada  
University of Washington Medical Center

## **Item S2. List of STOP-COVID investigators**

**Baylor College of Medicine:** Carl P. Walther\*, Samaya J. Anumudu

**Baylor University Medical Center:** Justin Arunthamakun\*, Kathleen F. Kopecky, Gregory P. Milligan, Peter A. McCullough, Thuy-Duyen Nguyen

**Beth Israel Deaconess Medical Center:** Shahzad Shaefi\*, Megan L. Krajewski, Sidharth Shankar, Aameeka Pannu, Juan D. Valencia

**Boston Medical Center:** Sushrut S. Waikar\*, Zoe A. Kibbelaar

**Cook County Health:** Ambarish M. Athavale\*, Peter Hart, Shristi Upadhyay, Ishaan Vohra

**Cooper University Health Care:** Adam Green\*, Jean-Sebastien Rachoin, Christa A. Schorr, Lisa Shea

**Duke University Medical Center:** Daniel L. Edmonston\*, Christopher L. Mosher

**Hackensack Meridian Health Mountainside Medical Center:** Alexandre M. Shehata\*, Zaza Cohen, Valerie Allusson, Gabriela Bambrick-Santoyo, Noor ul aain Bhatti, Bijal Mehta, Aquino Williams

**Hackensack Meridian Health Hackensack University Medical Center:** Samantha K. Brenner\*, Patricia Walters, Ronaldo C. Go, Keith M. Rose

**Icahn School of Medicine at Mount Sinai:** Lili Chan\*, Kusum S. Mathews\*, Steven G. Coca, Deena R. Altman, Aparna Saha, Howard Soh, Huei Hsun Wen, Sonali Bose, Emily A. Leven, Jing G. Wang, Gohar Mosoyan, Girish N. Nadkarni, Pattharawin Pattharanitima, Emily J. Gallagher

**Indiana University School of Medicine/Indiana University Health:** Allon N. Friedman\*, John Guirguis, Rajat Kapoor, Christopher Meshberger, Katherine J. Kelly

**Johns Hopkins Hospital:** Chirag R. Parikh\*, Brian T. Garibaldi, Celia P. Corona-Villalobos, Yumeng Wen, Steven Menez, Rubab F. Malik, Elena Cervantes, Samir Gautam

**Kings County Hospital Center:** Mary C. Mallappallil\*, Jie Ouyang, Sabu John, Ernie Yap, Yohannes Melaku, Ibrahim Mohamed, Siddhartha Bajracharya, Isha Puri, Mariah Thaxton, Jyotsna Bhattacharya, John Wagner, Leon Boudourakis

**Loma Linda University:** H. Bryant Nguyen\*, Afshin Ahoumim

**Mayo Clinic:** Kianoush Kashani\*, Shahrzad Tehranian

**Mayo Clinic, Arizona:** Leslie F. Thomas\*, Dheeraj Reddy Sirganagari

**Mayo Clinic, Florida:** Pramod K. Guru\*

**Medical College of Wisconsin:** Yan Zhou,\* Paul A. Bergl, Jesus Rodriguez, Jatan A. Shah, Mrigank S. Gupta

**MedStar Georgetown University Hospital:** Princy N. Kumar\*, Deepa G. Lazarous, Seble G. Kassaye

**Montefiore Medical Center/Albert Einstein College of Medicine:** Michal L. Melamed\*, Tanya S. Johns. Ryan Mocerino, Kalyan Prudhvi, Denzel Zhu, Rebecca V. Levy, Yorg Azzi, Molly Fisher, Milagros Yunes, Kaltrina Sedaliu, Ladan Golestaneh, Maureen Brogan, Neelja Kumar, Michael Chang, Jyotsana Thakkar

**New York-Presbyterian Queens Hospital:** Ritesh Raichoudhury\*, Akshay Athreya, Mohamed Farag

**New York-Presbyterian/Weill Cornell Medical Center:** Edward J. Schenck\*, Soo Jung Cho, Maria Plataki, Sergio L. Alvarez-Mulett, Luis G. Gomez-Escobar, Di Pan, Stefi Lee, Jamuna Krishnan, William Whalen

**New York University Langone Hospital:** David Charytan\*, Ashley Macina, Sobaata Chaudhry, Benjamin Wu, Frank Modersitzki

**Northwestern Memorial Hospital:** Northwestern University Feinberg School of Medicine - Anand Srivastava\*, Alexander S. Leidner, Carlos Martinez, Jacqueline M. Kruser, Richard G. Wunderink, Alexander J. Hodakowski

**Ochsner Medical Center:** Juan Carlos Q. Velez\*, Eboni G. Price-Haywood, Luis A. Matute-Trochez, Anna E. Hasty, Muner MB. Mohamed

**Oregon Health and Science University Hospital:** Rupali S. Avasare\*, David Zonies\*

**Partners Healthcare:** Brigham and Women's Hospital, Brigham and Women's Faulkner Hospital, Massachusetts General Hospital, and Newton Wellesley Hospital - David E. Leaf\*, Shruti Gupta\*, Meghan E. Sise, Erik T. Newman, Samah Abu Omar, Kapil K. Pokharel, Shreyak Sharma, Harkarandeep Singh, Simon Correa, Tanveer Shaikat, Omer Kamal, Wei Wang, Heather Yang, Jeffery O. Boateng, Meghan Lee, Ian A. Strohhahn, Jiahua Li, Ariel L. Mueller

**ProMedica Health System:** Roberta Redfern\*, Nicholas S. Cairl, Gabriel Naimy, Abeer Abu-Saif, Danyell Hall, Laura Bickley

**Renown Health:** Chris Rowan\*, Farah Madhai-Lovely\*

**Rush University Medical Center:** Vasil Peev\*, Jochen Reiser, John J. Byun, Andrew Vissing, Esha M. Kapania, Zoe Post, Nilam P. Patel, Joy-Marie Hermes

**Rutgers/New Jersey Medical School:** Anne K. Sutherland\*, Ameer Patrawalla, Diana G. Finkel, Barbara A. Danek, Sowminya Arikapudi, Jeffrey M. Paer, Peter Cangialosi, Mark Liotta

**Rutgers/Robert Wood Johnson Medical School:** Jared Radbel\*, Sonika Puri, Jag Sunderram, Matthew T. Scharf, Ayesha Ahmed, Ilya Berim, Jayanth S. Vatson

**Stanford Healthcare:** Stanford University School of Medicine – Shuchi Anand\*, Joseph E. Levitt, Pablo Garcia

**Temple University Hospital:** Suzanne M. Boyle\*, Rui Song

**Thomas Jefferson University Hospital:** Jingjing Zhang\*, Sang Hoon Woo, Xiaoying Deng, Goni Katz-Greenberg, Katharine Senter

**Tulane Medical Center:** Moh'd A. Sharshir\*, Vadym V. Rusnak

**United Health Services Hospitals:** Muhammad Imran Ali

**University of Colorado Anschutz Medical Campus:** Anip Bansal\*, Amber S. Podoll, Michel Chonchol, Sunita Sharma, Ellen L. Burnham

**University Hospitals Cleveland Medical Center:** Arash Rashidi\*, Rana Hejal

**University of Alabama-Birmingham Hospital:** Eric Judd\*, Laura Latta, Ashita Tolwani

**University of California-Davis Medical Center:** Timothy E. Albertson\*, Jason Y. Adams

**University of California-Los Angeles Medical Center:** Ronald Reagan-UCLA Medical Center - Steven Y. Chang\*, Rebecca M. Beutler; UCLA Medical Center, Santa Monica – Carl E. Schulze

**University of California-San Diego Medical Center:** Etienne Macedo\*, Harin Rhee

**University of California-San Francisco Medical Center:** Kathleen D. Liu\*, Vasantha K. Jotwani

**University of Chicago Medical Center:** Jay L. Koyner\*

**University of Florida Health-Gainesville:** Chintan V. Shah\*

**University of Florida-Health-Jacksonville:** Vishal Jaikaransingh\*

**University of Illinois Hospital and Health Sciences System:** Stephanie M. Toth-Manikowski\*, Min J. Joo\*, James P. Lash

**University of Kentucky Medical Center:** Javier A. Neyra\*, Nourhan Chaaban

**University Medical Center of Southern Nevada:** Alfredo Iardino, Elizabeth H. Au, Jill H. Sharma

**University of Miami Health System:** Marie Anne Sosa\*, Sabrina Taldone, Gabriel Contreras, David De La Zerda, Hayley B. Gershengorn

**University of Michigan:** Salim S. Hayek\*, Penelope Blakely, Hanna Berlin, Tariq U. Azam, Husam Shadid, Michael Pan, Patrick O' Hayer, Chelsea Meloche, Rafey Feroze, Rayan Kaakati, Danny Perry, Abbas Bitar, Elizabeth Anderson, Kishan J. Padalia, John P. Donnelly, Andrew J. Admon

**University of North Carolina School of Medicine:** Jennifer E. Flythe\*, Matthew J. Tugman, Emily H. Chang

**University of Oklahoma Health Sciences Center:** Brent R. Brown\*

**University of Pennsylvania Health System:** Amanda K. Leonberg-Yoo\*, Ryan C. Spiardi, Todd A. Miano, Meaghan S. Roche, Charles R. Vasquez

**University of Pittsburgh Medical Center:** Amar D. Bansal\*, Natalie C. Ernecoff, Sanjana Kapoor, Siddharth Verma, Huiwen Chen

**University of Tennessee Health Science Center and Memphis VA Medical Center/Methodist University Hospital –** Csaba P. Kovesdy\*, Miklos Z. Molnar\*, Ambreen Azhar

**University of Texas Southwestern Medical Center and Parkland Health and Hospital System:** S. Susan Hedayati\*, Mridula V. Nadamuni, Shani Shastri, Duwayne L. Willett

**University of Vermont Larner College of Medicine:** Samuel A.P. Short

**University of Virginia Health System:** Amanda D. Renaghan\*, Kyle B. Enfield

**University of Washington Medical Center:** Pavan K. Bhatraju\*, A. Bilal Malik

**Vanderbilt University Medical Center:** Matthew W. Semler

**Washington University in St. Louis/Barnes Jewish Hospital:** Anitha Vijayan\*, Christina Mariyam Joy, Tingting Li, Seth Goldberg, Patricia F. Kao

**Wellforce Health System:** Lowell General Hospital - Greg L. Schumaker\*, Tufts Medical Center - Nitender Goyal\*, Anthony J. Faugno, Greg L. Schumaker, Caroline M. Hsu, Asma Tariq, Leah Meyer, Ravi K. Kshirsagar, Daniel E. Weiner, Aju Jose

**Westchester Medical Center:** Marta Christov\*, Jennifer Griffiths, Sanjeev Gupta, Aromma Kapoor

**Yale School of Medicine:** Perry Wilson\*, Tanim Arora, Ugochukwu Ugwuowo

\*Site Principal Investigator

**Table S1. Outcome definitions**

| <b>Outcome</b>                           | <b>Definition</b>                                                                                                                                                                                                                    |
|------------------------------------------|--------------------------------------------------------------------------------------------------------------------------------------------------------------------------------------------------------------------------------------|
| In-hospital death                        | In-hospital death due to any cause                                                                                                                                                                                                   |
| Respiratory failure                      | Requiring invasive mechanical ventilation                                                                                                                                                                                            |
| Shock                                    | Requiring 2 or more vasopressors                                                                                                                                                                                                     |
| Ventricular arrhythmia or cardiac arrest | Occurrence of ventricular tachycardia, ventricular fibrillation, or cardiac arrest                                                                                                                                                   |
| Major bleed                              | Bleeding in a critical area or organ (e.g. intracranial, retroperitoneal, pericardial, intramuscular with compartment syndrome) or bleeding requiring a procedural intervention (e.g. EGD, embolization by interventional radiology) |
| Thromboembolic event                     | Occurrence of a deep vein thrombosis, pulmonary embolism, or stroke                                                                                                                                                                  |
| Acute liver injury                       | Bilirubin > 3.0 mg/dL <i>and</i> either an AST > 100 units/L or ALT > 100 units/L <sup>a</sup>                                                                                                                                       |

<sup>a</sup> Based on a modified version of the Common Terminology Criteria for Adverse Events criteria.

Abbreviations: ALT, alanine aminotransferase; AST, aspartate aminotransferase; EGD, esophagogastroduodenoscopy.



**Table S2. Characteristics of critically ill COVID-19 patients with pre-existing kidney failure receiving maintenance dialysis and non-dialysis dependent CKD on ICU day 1**

| Characteristic                        | Maintenance dialysis patients<br>n = 143 | Patients with non-dialysis CKD<br>n = 521 | Standardized difference |
|---------------------------------------|------------------------------------------|-------------------------------------------|-------------------------|
| <b>Demographics</b>                   |                                          |                                           |                         |
| Age (years)                           | 65 [56-71]                               | 69 [60-76]                                | 0.31                    |
| Male                                  | 77 (54%)                                 | 323 (62%)                                 | 0.17                    |
| Race <sup>a</sup>                     |                                          |                                           |                         |
| White                                 | 48 (34%)                                 | 184 (35%)                                 | 0.04                    |
| Black                                 | 71 (50%)                                 | 232 (45%)                                 | 0.10                    |
| Other race                            | 5 (3%)                                   | 34 (7%)                                   | 0.14                    |
| Unknown/not reported                  | 19 (13%)                                 | 71 (14%)                                  | 0.01                    |
| Ethnicity <sup>a</sup>                |                                          |                                           |                         |
| Hispanic                              | 29 (20%)                                 | 66 (13%)                                  | 0.21                    |
| Non-Hispanic                          | 107 (75%)                                | 411 (79%)                                 | 0.10                    |
| Unknown/not reported                  | 7 (5%)                                   | 44 (8%)                                   | 0.14                    |
| BMI (kg/m <sup>2</sup> )              | 28.3 [23.8-34.7]                         | 30.3 [26.3-36.3]                          | 0.25                    |
| <b>U.S. geographic region</b>         |                                          |                                           |                         |
| Northeast                             | 78 (55%)                                 | 241 (46%)                                 | 0.17                    |
| South                                 | 27 (19%)                                 | 65 (12%)                                  | 0.18                    |
| Midwest                               | 31 (22%)                                 | 169 (32%)                                 | 0.24                    |
| West                                  | 7 (5%)                                   | 46 (9%)                                   | 0.16                    |
| <b>Comorbid conditions</b>            |                                          |                                           |                         |
| Diabetes                              | 97 (68%)                                 | 329 (63%)                                 | 0.10                    |
| Hypertension                          | 125 (87%)                                | 451 (87%)                                 | 0.03                    |
| Coronary artery disease               | 55 (38%)                                 | 146 (28%)                                 | 0.22                    |
| Heart failure                         | 44 (31%)                                 | 136 (26%)                                 | 0.10                    |
| Atrial fibrillation or flutter        | 31 (22%)                                 | 70 (13%)                                  | 0.22                    |
| Asthma or COPD                        | 21 (15%)                                 | 118 (23%)                                 | 0.21                    |
| Chronic liver disease                 | 7 (5%)                                   | 33 (6%)                                   | 0.06                    |
| <b>Home medications</b>               |                                          |                                           |                         |
| ACE inhibitor or ARB                  | 35 (24%)                                 | 243 (47%)                                 | 0.48                    |
| Beta blocker                          | 98 (69%)                                 | 264 (51%)                                 | 0.37                    |
| Other antihypertensive                | 69 (48%)                                 | 296 (57%)                                 | 0.17                    |
| Statin                                | 80 (56%)                                 | 317 (61%)                                 | 0.10                    |
| Aspirin                               | 65 (45%)                                 | 213 (41%)                                 | 0.09                    |
| Anticoagulant                         | 38 (27%)                                 | 95 (18%)                                  | 0.20                    |
| NSAIDs                                | 3 (2%)                                   | 26 (5%)                                   | 0.16                    |
| HCQ or CQ <sup>b</sup>                | 5 (3%)                                   | 16 (3%)                                   | 0.02                    |
| Azithromycin <sup>b</sup>             | 6 (4%)                                   | 25 (5%)                                   | 0.03                    |
| HCQ or CQ + azithromycin <sup>b</sup> | 3 (2%)                                   | 6 (1%)                                    | 0.08                    |
| <b>Source of admission to the ICU</b> |                                          |                                           |                         |
| Emergency department                  | 82 (57%)                                 | 299 (57%)                                 | 0.001                   |
| Hospital ward                         | 47 (33%)                                 | 165 (32%)                                 | 0.03                    |
| Transfer from another hospital        | 12 (8%)                                  | 50 (10%)                                  | 0.04                    |
| Other                                 | 2 (1%)                                   | 6 (1%)                                    | 0.01                    |

|                                                 |                  |                  |      |
|-------------------------------------------------|------------------|------------------|------|
| <b>Days from symptom onset to ICU admission</b> | 4 [2-9]          | 7 [3-10]         | 0.25 |
| <b>Symptoms</b>                                 |                  |                  |      |
| Shortness of breath                             | 85 (59%)         | 360 (69%)        | 0.20 |
| Cough                                           | 81 (57%)         | 322 (62%)        | 0.11 |
| Sputum production                               | 17 (12%)         | 58 (11%)         | 0.02 |
| Hemoptysis                                      | 4 (3%)           | 7 (1%)           | 0.10 |
| Nasal congestion                                | 10 (7%)          | 32 (6%)          | 0.03 |
| Sore throat                                     | 6 (4%)           | 42 (8%)          | 0.16 |
| Fever                                           | 82 (57%)         | 294 (56%)        | 0.02 |
| Chills                                          | 28 (20%)         | 88 (17%)         | 0.07 |
| Headache                                        | 4 (3%)           | 27 (5%)          | 0.12 |
| Altered mental status                           | 36 (25%)         | 106 (20%)        | 0.12 |
| Fatigue or malaise                              | 45 (31%)         | 184 (35%)        | 0.08 |
| Myalgia or arthralgia                           | 15 (10%)         | 94 (18%)         | 0.22 |
| Nausea or vomiting                              | 27 (19%)         | 60 (12%)         | 0.21 |
| Diarrhea                                        | 26 (18%)         | 115 (22%)        | 0.10 |
| <b>Vital signs</b>                              |                  |                  |      |
| Highest temperature (°C)                        | 37.8 [37.1-38.5] | 37.7 [37.1-38.4] | 0.04 |
| Fever (>38°C)                                   | 65 (45%)         | 213 (41%)        | 0.09 |
| Lowest systolic BP (mmHg)                       | 92 [81-108]      | 96 [84-112]      | 0.16 |
| Highest heart rate (beats/min)                  | 101 [88-119]     | 101 [87-116]     | 0.08 |
| Highest respiratory rate (breaths/min)          | 29 [23-35]       | 30 [26-36]       | 0.16 |
| <b>Severity of illness</b>                      |                  |                  |      |
| Invasive mechanical ventilation                 | 80 (56%)         | 311 (60%)        | 0.08 |
| PEEP (cm H <sub>2</sub> O)                      | 10 [8-14]        | 10 [10-15]       | 0.22 |
| PaO <sub>2</sub> :FiO <sub>2</sub> ratio (mmHg) | 164 [101-267]    | 125 [79-190]     | 0.37 |
| Non-invasive mechanical ventilation             | 3 (2%)           | 16 (3%)          | 0.06 |
| High-flow nasal cannula or non-rebreather mask  | 29 (20%)         | 121 (23%)        | 0.07 |
| AKI requiring dialysis                          | --               | 27 (5%)          | --   |
| Renal SOFA score <sup>c</sup>                   |                  |                  |      |
| 0 (creatinine < 1.2 mg/dL)                      | 0 (0%)           | 62 (12%)         | 0.52 |
| 1 (creatinine 1.2-1.9 mg/dL)                    | 0 (0%)           | 168 (32%)        | 0.98 |
| 2 (creatinine 2.0-3.4 mg/dL)                    | 0 (0%)           | 143 (27%)        | 0.87 |
| 3 (creatinine 3.5-4.9 mg/dL)                    | 0 (0%)           | 68 (13%)         | 0.55 |
| 4 (creatinine ≥ 5.0 mg/dL or RRT)               | 143 (100%)       | 80 (15%)         | 3.32 |
| Liver SOFA score <sup>d</sup>                   |                  |                  |      |
| 0 (bilirubin < 1.2 mg/dL)                       | 132 (92%)        | 482 (93%)        | 0.01 |
| 1 (bilirubin 1.2-1.9 mg/dL)                     | 7 (5%)           | 28 (5%)          | 0.02 |
| ≥ 2 (bilirubin ≥ 2.0 mg/dL)                     | 4 (3%)           | 11 (2%)          | 0.04 |
| Coagulation SOFA score <sup>e</sup>             |                  |                  |      |
| 0 (platelet count ≥ 150 K/mm <sup>3</sup> )     | 90 (63%)         | 408 (78%)        | 0.01 |
| 1 (platelets count 100-149 K/mm <sup>3</sup> )  | 37 (26%)         | 80 (15%)         | 0.02 |
| ≥ 2 (platelet count < 100 K/mm <sup>3</sup> )   | 16 (11%)         | 33 (6%)          | 0.04 |
| Vasopressor or inotrope use                     | 72 (50%)         | 219 (42%)        | 0.17 |
| Shock <sup>f</sup>                              | 17 (12%)         | 75 (14%)         | 0.07 |

**Other infections**

|                            |          |          |      |
|----------------------------|----------|----------|------|
| Bacterial pneumonia        | 24 (17%) | 85 (16%) | 0.01 |
| Bacteremia or endocarditis | 11 (8%)  | 16 (3%)  | 0.21 |

**Laboratory findings**

|                                       |                    |                    |      |
|---------------------------------------|--------------------|--------------------|------|
| White cell count (K/mm <sup>3</sup> ) | 7.5 [5.7-10.4]     | 8.2 [5.8-11.6]     | 0.15 |
| Lymphocyte count (K/mm <sup>3</sup> ) | 9.7 [5.4-15.1]     | 9.4 [5.7-14.9]     | 0.01 |
| Hemoglobin (g/dL)                     | 10.3 [9.0-11.8]    | 11.4 [9.5-12.9]    | 0.41 |
| Platelet count (K/mm <sup>3</sup> )   | 167 [124-212]      | 202 [155-258]      | 0.43 |
| Creatinine (mg/dL)                    | 7.7 [5.6-10.1]     | 2.2 [1.5-3.6]      | 1.77 |
| Albumin (g/dL)                        | 3.3 [2.9-3.6]      | 3.1 [2.6-3.5]      | 0.28 |
| AST (units/L)                         | 46 [30-72]         | 48 [33-80]         | 0.05 |
| ALT (units/L)                         | 23 [17-40]         | 28 [18-47]         | 0.17 |
| Bilirubin (mg/dL)                     | 0.6 [0.4-0.7]      | 0.5 [0.3-0.8]      | 0.10 |
| Lactate (mmol/L)                      | 1.6 [1.0-2.6]      | 1.6 [1.0-2.4]      | 0.03 |
| CRP (mg/L)                            | 170.0 [73.0-277.7] | 142.4 [84.8-217.5] | 0.17 |
| IL-6 (pg/mL)                          | 121.4 [41.3-320.4] | 52.0 [19.0-175.3]  | 0.43 |
| Arterial pH                           | 7.37 [7.28-7.43]   | 7.34 [7.26-7.40]   | 0.27 |
| Fibrinogen (mg/dL)                    | 542 [369-619]      | 588 [442-732]      | 0.38 |
| D-dimer (ng/mL)                       | 1347 [609-2623]    | 1385 [670-3018]    | 0.01 |
| Ferritin (ng/mL)                      | 3406 [1795-6271]   | 984 [450-1981]     | 1.10 |
| Troponin T (ng/mL)                    | 175 [95-364]       | 51 [25-110]        | 0.98 |
| Troponin I (ng/mL)                    | 140 [70-330]       | 55 [20-170]        | 0.58 |

Values are n (%) for categorical variables and median [quartile 1 – quartile 3] for continuous variables. An absolute standardized mean difference > 0.1 represents a meaningful difference between groups. Variables with missing values are listed in Supplemental Table S13.

<sup>a</sup> Information on ethnicity and race were abstracted from the electronic health record of each patient. In the U.S., people of Hispanic ethnicity are those of Cuban, Mexican, Puerto Rican, South or Central American, or other Spanish culture or origin regardless of race.

<sup>b</sup> The anti-infective medication categories HCQ or CQ, azithromycin, and HCQ or CQ + azithromycin are not mutually exclusive.

<sup>c</sup> Renal component of the SOFA score was based on serum creatinine levels. Patients who did not have a serum creatinine drawn on ICU day 1 were classified as having a renal SOFA score of 0, and patients on RRT were classified as having a renal SOFA score of 4.<sup>49</sup>

<sup>d</sup> Liver component of the SOFA score. Patients who did not have a serum bilirubin drawn on ICU day 1 were classified as having a liver SOFA score of 0.<sup>49</sup>

<sup>e</sup> Coagulation component of the SOFA score. Patients who did not have a platelet count drawn on ICU day 1 were classified as having a coagulation SOFA score of 0.<sup>49</sup>

<sup>f</sup> Shock is defined as the requirement of ≥ 2 vasopressors or inotropes.

**Abbreviations:** ACE, angiotensin converting enzyme; AKI, acute kidney injury; ALT, alanine aminotransferase; ARB, angiotensin II receptor blocker; AST, aspartate aminotransferase; BMI, body mass index; BP, blood pressure; CKD, chronic kidney disease; COPD, chronic obstructive pulmonary disease; CQ, chloroquine; CRP, C-reactive protein; FiO<sub>2</sub>, fraction of inspired oxygen; HCQ, hydroxychloroquine; ICU, intensive care unit; IL, interleukin; NSAIDs, non-steroidal anti-inflammatory drug; PaO<sub>2</sub>, partial pressure of oxygen; PEEP, positive end-expiratory pressure; RRT, renal replacement therapy; SOFA, Sequential Organ Failure Assessment; U.S., United States.

**Table S3. Characteristics of critically ill COVID-19 patients with pre-existing kidney failure receiving maintenance dialysis and without pre-existing CKD on ICU day 1**

| Characteristic                        | Maintenance dialysis patients<br>n = 143 | Patients without pre-existing CKD<br>n = 3600 | Standardized difference |
|---------------------------------------|------------------------------------------|-----------------------------------------------|-------------------------|
| <b>Demographics</b>                   |                                          |                                               |                         |
| Age (years)                           | 65 [56-71]                               | 61 [51-70]                                    | 0.25                    |
| Male                                  | 77 (54%)                                 | 2314 (64%)                                    | 0.21                    |
| Race <sup>a</sup>                     |                                          |                                               |                         |
| White                                 | 48 (34%)                                 | 1403 (39%)                                    | 0.11                    |
| Black                                 | 71 (50%)                                 | 963 (27%)                                     | 0.49                    |
| Other race                            | 5 (3%)                                   | 309 (9%)                                      | 0.22                    |
| Unknown/not reported                  | 19 (13%)                                 | 925 (26%)                                     | 0.32                    |
| Ethnicity <sup>a</sup>                |                                          |                                               |                         |
| Hispanic                              | 29 (20%)                                 | 919 (26%)                                     | 0.13                    |
| Non-Hispanic                          | 107 (75%)                                | 2,218 (62%)                                   | 0.29                    |
| Unknown/not reported                  | 7 (5%)                                   | 463 (13%)                                     | 0.28                    |
| BMI (kg/m <sup>2</sup> )              | 28.3 [23.8-34.7]                         | 30.4 [26.5-35.6]                              | 0.25                    |
| <b>U.S. geographic region</b>         |                                          |                                               |                         |
| Northeast                             | 78 (55%)                                 | 2175 (60%)                                    | 0.12                    |
| South                                 | 27 (19%)                                 | 388 (11%)                                     | 0.23                    |
| Midwest                               | 31 (22%)                                 | 717 (20%)                                     | 0.04                    |
| West                                  | 7 (5%)                                   | 320 (9%)                                      | 0.16                    |
| <b>Comorbid conditions</b>            |                                          |                                               |                         |
| Diabetes                              | 97 (68%)                                 | 1337 (37%)                                    | 0.65                    |
| Hypertension                          | 125 (87%)                                | 2036 (57%)                                    | 0.73                    |
| Coronary artery disease               | 55 (38%)                                 | 374 (10%)                                     | 0.69                    |
| Heart failure                         | 44 (31%)                                 | 233 (6%)                                      | 0.66                    |
| Atrial fibrillation or flutter        | 31 (22%)                                 | 211 (6%)                                      | 0.47                    |
| Asthma or COPD                        | 21 (15%)                                 | 617 (17%)                                     | 0.07                    |
| Chronic liver disease                 | 7 (5%)                                   | 103 (3%)                                      | 0.11                    |
| <b>Home medications</b>               |                                          |                                               |                         |
| ACE inhibitor or ARB                  | 35 (24%)                                 | 1127 (31%)                                    | 0.15                    |
| Beta blocker                          | 98 (69%)                                 | 768 (21%)                                     | 1.08                    |
| Other antihypertensive                | 69 (48%)                                 | 937 (26%)                                     | 0.47                    |
| Statin                                | 80 (56%)                                 | 1226 (34%)                                    | 0.45                    |
| Aspirin                               | 65 (45%)                                 | 668 (19%)                                     | 0.60                    |
| Anticoagulant                         | 38 (27%)                                 | 294 (8%)                                      | 0.50                    |
| NSAIDs                                | 3 (2%)                                   | 322 (9%)                                      | 0.30                    |
| HCQ or CQ <sup>b</sup>                | 5 (3%)                                   | 134 (4%)                                      | 0.01                    |
| Azithromycin <sup>b</sup>             | 6 (4%)                                   | 261 (7%)                                      | 0.13                    |
| HCQ or CQ + azithromycin <sup>b</sup> | 3 (2%)                                   | 68 (2%)                                       | 0.02                    |
| <b>Source of admission to the ICU</b> |                                          |                                               |                         |
| Emergency department                  | 82 (57%)                                 | 1981 (55%)                                    | 0.05                    |
| Hospital ward                         | 47 (33%)                                 | 1114 (31%)                                    | 0.04                    |
| Transfer from another hospital        | 12 (8%)                                  | 487 (14%)                                     | 0.17                    |
| Other                                 | 2 (1%)                                   | 18 (1%)                                       | 0.09                    |

|                                                 |                  |                  |      |
|-------------------------------------------------|------------------|------------------|------|
| <b>Days from symptom onset to ICU admission</b> | 4 [2-9]          | 7 [4-10]         | 0.43 |
| <b>Symptoms</b>                                 |                  |                  |      |
| Shortness of breath                             | 85 (59%)         | 2733 (76%)       | 0.36 |
| Cough                                           | 81 (57%)         | 2698 (75%)       | 0.39 |
| Sputum production                               | 17 (12%)         | 374 (10%)        | 0.05 |
| Hemoptysis                                      | 4 (3%)           | 53 (1%)          | 0.09 |
| Nasal congestion                                | 10 (7%)          | 207 (6%)         | 0.05 |
| Sore throat                                     | 6 (4%)           | 286 (8%)         | 0.16 |
| Fever                                           | 82 (57%)         | 2486 (69%)       | 0.25 |
| Chills                                          | 28 (20%)         | 698 (19%)        | 0.01 |
| Headache                                        | 4 (3%)           | 343 (10%)        | 0.28 |
| Altered mental status                           | 36 (25%)         | 418 (12%)        | 0.36 |
| Fatigue or malaise                              | 45 (31%)         | 1118 (31%)       | 0.01 |
| Myalgia or arthralgia                           | 15 (10%)         | 815 (23%)        | 0.33 |
| Nausea or vomiting                              | 27 (19%)         | 573 (16%)        | 0.08 |
| Diarrhea                                        | 26 (18%)         | 708 (20%)        | 0.04 |
| <b>Vital signs</b>                              |                  |                  |      |
| Highest temperature (°C)                        | 37.8 [37.1-38.5] | 38.0 [37.2-38.9] | 0.24 |
| Fever (>38°C)                                   | 65 (45%)         | 1837 (51%)       | 0.11 |
| Lowest systolic BP (mmHg)                       | 92 [81-108]      | 97 [85-110]      | 0.18 |
| Highest heart rate (beats/min)                  | 101 [88-119]     | 105 [92-121]     | 0.14 |
| Highest respiratory rate (breaths/min)          | 29 [23-35]       | 32 [26-38]       | 0.31 |
| <b>Severity of illness</b>                      |                  |                  |      |
| Invasive mechanical ventilation                 | 80 (56%)         | 2284 (63%)       | 0.15 |
| PEEP (cm H <sub>2</sub> O)                      | 10 [8-14]        | 12 [10-15]       | 0.50 |
| PaO <sub>2</sub> :FiO <sub>2</sub> ratio (mmHg) | 164 [101-267]    | 122 [83-191]     | 0.36 |
| Non-invasive mechanical ventilation             | 3 (2%)           | 86 (2%)          | 0.02 |
| High-flow nasal cannula or non-rebreather mask  | 29 (20%)         | 801 (22%)        | 0.05 |
| AKI requiring dialysis                          | --               | 55 (2%)          | --   |
| Renal SOFA score <sup>c</sup>                   |                  |                  |      |
| 0 (creatinine < 1.2 mg/dL)                      | 0 (0%)           | 2347 (65%)       | 1.94 |
| 1 (creatinine 1.2-1.9 mg/dL)                    | 0 (0%)           | 844 (23%)        | 0.78 |
| 2 (creatinine 2.0-3.4 mg/dL)                    | 0 (0%)           | 255 (7%)         | 0.39 |
| 3 (creatinine 3.5-4.9 mg/dL)                    | 0 (0%)           | 71 (2%)          | 0.20 |
| 4 (creatinine ≥ 5.0 mg/dL or RRT)               | 143 (100%)       | 83 (2%)          | 9.21 |
| Liver SOFA score <sup>d</sup>                   |                  |                  |      |
| 0 (bilirubin < 1.2 mg/dL)                       | 132 (92%)        | 3253 (90%)       | 0.07 |
| 1 (bilirubin 1.2-1.9 mg/dL)                     | 7 (5%)           | 251 (7%)         | 0.09 |
| ≥ 2 (bilirubin ≥ 2.0 mg/dL)                     | 4 (3%)           | 96 (3%)          | 0.01 |
| Coagulation SOFA score <sup>e</sup>             |                  |                  |      |
| 0 (platelet count ≥ 150 K/mm <sup>3</sup> )     | 90 (63%)         | 2989 (83%)       | 0.46 |
| 1 (platelet count 100-149 K/mm <sup>3</sup> )   | 37 (26%)         | 467 (13%)        | 0.33 |
| ≥ 2 (platelet count < 100 K/mm <sup>3</sup> )   | 16 (11%)         | 144 (4%)         | 0.27 |
| Vasopressor or inotrope use                     | 72 (50%)         | 1482 (41%)       | 0.19 |
| Shock <sup>f</sup>                              | 17 (12%)         | 370 (10%)        | 0.05 |

**Other infections**

|                            |          |           |      |
|----------------------------|----------|-----------|------|
| Bacterial pneumonia        | 24 (17%) | 489 (14%) | 0.09 |
| Bacteremia or endocarditis | 11 (8%)  | 80 (2%)   | 0.25 |

**Laboratory findings**

|                                       |                    |                    |       |
|---------------------------------------|--------------------|--------------------|-------|
| White cell count (K/mm <sup>3</sup> ) | 7.5 [5.7-10.4]     | 8.5 [6.1-11.9]     | 0.22  |
| Lymphocyte count (K/mm <sup>3</sup> ) | 9.7 [5.4-15.1]     | 10.0 [6.0-15.1]    | 0.05  |
| Hemoglobin (g/dL)                     | 10.3 [9.0-11.8]    | 12.8 [11.4-14.2]   | 1.13  |
| Platelet count (K/mm <sup>3</sup> )   | 167 [124-212]      | 218 [167-281]      | 0.63  |
| Creatinine (mg/dL)                    | 7.7 [5.6-10.1]     | 1.0 [0.8-1.4]      | 2.35  |
| Albumin (g/dL)                        | 3.3 [2.9-3.6]      | 3.2 [2.8-3.6]      | 0.13  |
| AST (units/L)                         | 46 [30-72]         | 54 [36-85]         | 0.19  |
| ALT (units/L)                         | 23 [17-40]         | 38 [24-62]         | 0.52  |
| Bilirubin (mg/dL)                     | 0.6 [0.4-0.7]      | 0.6 [0.4-0.8]      | 0.17  |
| Lactate (mmol/L)                      | 1.6 [1.0-2.6]      | 1.6 [1.1-2.3]      | 0.04  |
| CRP (mg/L)                            | 170.0 [73.0-277.7] | 151.0 [81.6-235.7] | 0.13  |
| IL-6 (pg/mL)                          | 121.4 [41.3-320.4] | 56.0 [18.0-156.6]  | 0.45  |
| Arterial pH                           | 7.37 [7.28-7.43]   | 7.38 [7.30-7.44]   | 0.09  |
| Fibrinogen (mg/dL)                    | 542 [369-619]      | 614 [491-764]      | 0.51  |
| D-dimer (ng/mL)                       | 1347 [609-2623]    | 1270 [652-3459]    | 0.002 |
| Ferritin (ng/mL)                      | 3406 [1795-6271]   | 947 [489-1919]     | 1.12  |
| Troponin T (ng/mL)                    | 175 [95-364]       | 12 [4-40]          | 1.62  |
| Troponin I (ng/mL)                    | 140 [70-330]       | 30 [10-110]        | 0.94  |

Values are n (%) for categorical variables and median [quartile 1 – quartile 3] for continuous variables. An absolute standardized mean difference > 0.1 represents a meaningful difference between groups. Variables with missing values are listed in Supplemental Table S13.

<sup>a</sup> Information on ethnicity and race were abstracted from the electronic health record of each patient. In the U.S., people of Hispanic ethnicity are those of Cuban, Mexican, Puerto Rican, South or Central American, or other Spanish culture or origin regardless of race.

<sup>b</sup> The anti-infective medication categories HCQ or CQ, azithromycin, and HCQ or CQ + azithromycin are not mutually exclusive.

<sup>c</sup> Renal component of the SOFA score was based on serum creatinine levels. Patients who did not have a serum creatinine drawn on ICU day 1 were classified as having a renal SOFA score of 0, and patients on RRT were classified as having a renal SOFA score of 4.<sup>49</sup>

<sup>d</sup> Liver component of the SOFA score. Patients who did not have a serum bilirubin drawn on ICU day 1 were classified as having a liver SOFA score of 0.<sup>49</sup>

<sup>e</sup> Coagulation component of the SOFA score. Patients who did not have a platelet count drawn on ICU day 1 were classified as having a coagulation SOFA score of 0.<sup>49</sup>

<sup>f</sup> Shock is defined as the requirement of ≥ 2 vasopressors or inotropes.

**Abbreviations:** ACE, angiotensin converting enzyme; AKI, acute kidney injury; ALT, alanine aminotransferase; ARB, angiotensin II receptor blocker; AST, aspartate aminotransferase; BMI, body mass index; BP, blood pressure; COPD, chronic obstructive pulmonary disease; CQ, chloroquine; CRP, C-reactive protein; FiO<sub>2</sub>, fraction of inspired oxygen; HCQ, hydroxychloroquine; ICU, intensive care unit; IL, interleukin; NSAIDs, non-steroidal anti-inflammatory drug; PaO<sub>2</sub>, partial pressure of oxygen; PEEP, positive end-expiratory pressure; RRT, renal replacement therapy; SOFA, Sequential Organ Failure Assessment; U.S., United States.

**Table S4. Characteristics of critically ill COVID-19 patients with pre-existing non-dialysis dependent CKD and without pre-existing CKD on ICU day 1**

| Characteristic                        | Patients with non-dialysis CKD<br>n = 521 | Patients without pre-existing CKD<br>n = 3600 | Standardized difference |
|---------------------------------------|-------------------------------------------|-----------------------------------------------|-------------------------|
| <b>Demographics</b>                   |                                           |                                               |                         |
| Age (years)                           | 69 [60-76]                                | 61 [51-70]                                    | 0.55                    |
| Male                                  | 323 (62%)                                 | 2314 (64%)                                    | 0.05                    |
| Race <sup>a</sup>                     |                                           |                                               |                         |
| White                                 | 184 (35%)                                 | 1403 (39%)                                    | 0.08                    |
| Black                                 | 232 (45%)                                 | 963 (27%)                                     | 0.38                    |
| Other race                            | 34 (7%)                                   | 309 (9%)                                      | 0.08                    |
| Unknown/not reported                  | 71 (14%)                                  | 925 (26%)                                     | 0.31                    |
| Ethnicity <sup>a</sup>                |                                           |                                               |                         |
| Hispanic                              | 66 (13%)                                  | 919 (26%)                                     | 0.33                    |
| Non-Hispanic                          | 411 (79%)                                 | 2218 (62%)                                    | 0.39                    |
| Unknown/not reported                  | 44 (8%)                                   | 463 (13%)                                     | 0.14                    |
| BMI (kg/m <sup>2</sup> )              | 30.3 [26.3-36.3]                          | 30.4 [26.5-35.6]                              | 0.001                   |
| <b>U.S. geographic region</b>         |                                           |                                               |                         |
| Northeast                             | 241 (46%)                                 | 2175 (60%)                                    | 0.30                    |
| South                                 | 65 (12%)                                  | 388 (11%)                                     | 0.05                    |
| Midwest                               | 169 (32%)                                 | 717 (20%)                                     | 0.30                    |
| West                                  | 46 (9%)                                   | 320 (9%)                                      | 0.00                    |
| <b>Comorbid conditions</b>            |                                           |                                               |                         |
| Diabetes                              | 329 (63%)                                 | 1337 (37%)                                    | 0.54                    |
| Hypertension                          | 451 (87%)                                 | 2036 (57%)                                    | 0.71                    |
| Coronary artery disease               | 146 (28%)                                 | 374 (10%)                                     | 0.46                    |
| Heart failure                         | 136 (26%)                                 | 233 (6%)                                      | 0.55                    |
| Atrial fibrillation or flutter        | 70 (13%)                                  | 211 (6%)                                      | 0.26                    |
| Asthma or COPD                        | 118 (23%)                                 | 617 (17%)                                     | 0.14                    |
| Chronic liver disease                 | 33 (6%)                                   | 103 (3%)                                      | 0.17                    |
| <b>Home medications</b>               |                                           |                                               |                         |
| ACE inhibitor or ARB                  | 243 (47%)                                 | 1127 (31%)                                    | 0.32                    |
| Beta blocker                          | 264 (51%)                                 | 768 (21%)                                     | 0.64                    |
| Other antihypertensive                | 296 (57%)                                 | 937 (26%)                                     | 0.66                    |
| Statin                                | 317 (61%)                                 | 1226 (34%)                                    | 0.56                    |
| Aspirin                               | 213 (41%)                                 | 668 (19%)                                     | 0.50                    |
| Anticoagulant                         | 95 (18%)                                  | 294 (8%)                                      | 0.30                    |
| NSAIDs                                | 26 (5%)                                   | 322 (9%)                                      | 0.16                    |
| HCQ or CQ <sup>b</sup>                | 16 (3%)                                   | 134 (4%)                                      | 0.04                    |
| Azithromycin <sup>b</sup>             | 25 (5%)                                   | 261 (7%)                                      | 0.10                    |
| HCQ or CQ + azithromycin <sup>b</sup> | 6 (1%)                                    | 68 (2%)                                       | 0.06                    |
| <b>Source of admission to the ICU</b> |                                           |                                               |                         |
| Emergency department                  | 299 (57%)                                 | 1981 (55%)                                    | 0.05                    |
| Hospital ward                         | 165 (32%)                                 | 1114 (31%)                                    | 0.02                    |
| Transfer from another hospital        | 50 (10%)                                  | 487 (14%)                                     | 0.12                    |
| Other                                 | 6 (1%)                                    | 18 (1%)                                       | 0.09                    |

|                                                 |                  |                  |       |
|-------------------------------------------------|------------------|------------------|-------|
| <b>Days from symptom onset to ICU admission</b> | 7 [3-10]         | 7 [4-10]         | 0.14  |
| <b>Symptoms</b>                                 |                  |                  |       |
| Shortness of breath                             | 360 (69%)        | 2733 (76%)       | 0.15  |
| Cough                                           | 322 (62%)        | 2698 (75%)       | 0.29  |
| Sputum production                               | 58 (11%)         | 374 (10%)        | 0.02  |
| Hemoptysis                                      | 7 (1%)           | 53 (1%)          | 0.01  |
| Nasal congestion                                | 32 (6%)          | 207 (6%)         | 0.02  |
| Sore throat                                     | 42 (8%)          | 286 (8%)         | 0.004 |
| Fever                                           | 294 (56%)        | 2486 (69%)       | 0.26  |
| Chills                                          | 88 (17%)         | 698 (19%)        | 0.07  |
| Headache                                        | 27 (5%)          | 343 (10%)        | 0.17  |
| Altered mental status                           | 106 (20%)        | 418 (12%)        | 0.24  |
| Fatigue or malaise                              | 184 (35%)        | 1118 (31%)       | 0.09  |
| Myalgia or arthralgia                           | 94 (18%)         | 815 (23%)        | 0.11  |
| Nausea or vomiting                              | 60 (12%)         | 573 (16%)        | 0.13  |
| Diarrhea                                        | 115 (22%)        | 708 (20%)        | 0.06  |
| <b>Vital signs</b>                              |                  |                  |       |
| Highest temperature (°C)                        | 37.7 [37.1-38.4] | 38.0 [37.2-38.9] | 0.29  |
| Fever (>38°C)                                   | 213 (41%)        | 1,837 (51%)      | 0.26  |
| Lowest systolic BP (mmHg)                       | 96 [84-112]      | 97 [85-110]      | 0.01  |
| Highest heart rate (beats/min)                  | 101 [87-116]     | 105 [92-121]     | 0.23  |
| Highest respiratory rate (breaths/min)          | 30 [26-36]       | 32 [26-38]       | 0.16  |
| <b>Severity of illness</b>                      |                  |                  |       |
| Invasive mechanical ventilation                 | 311 (60%)        | 2284 (63%)       | 0.08  |
| PEEP (cm H <sub>2</sub> O)                      | 10 [10-15]       | 12 [10-15]       | 0.26  |
| PaO <sub>2</sub> :FiO <sub>2</sub> ratio (mmHg) | 125 [79-190]     | 122 [83-191]     | 0.01  |
| Non-invasive mechanical ventilation             | 16 (3%)          | 86 (2%)          | 0.04  |
| High-flow nasal cannula or non-rebreather mask  | 121 (23%)        | 801 (22%)        | 0.02  |
| AKI requiring dialysis                          | 27 (5%)          | 55 (2%)          | 0.20  |
| Renal SOFA score <sup>c</sup>                   |                  |                  |       |
| 0 (creatinine < 1.2 mg/dL)                      | 62 (12%)         | 2347 (65%)       | 1.31  |
| 1 (creatinine 1.2-1.9 mg/dL)                    | 168 (32%)        | 844 (23%)        | 0.20  |
| 2 (creatinine 2.0-3.4 mg/dL)                    | 143 (27%)        | 255 (7%)         | 0.56  |
| 3 (creatinine 3.5-4.9 mg/dL)                    | 68 (13%)         | 71 (2%)          | 0.43  |
| 4 (creatinine ≥ 5.0 mg/dL or RRT)               | 80 (15%)         | 83 (2%)          | 0.47  |
| Liver SOFA score <sup>d</sup>                   |                  |                  |       |
| 0 (bilirubin < 1.2 mg/dL)                       | 482 (93%)        | 3253 (90%)       | 0.08  |
| 1 (bilirubin 1.2-1.9 mg/dL)                     | 28 (5%)          | 251 (7%)         | 0.07  |
| ≥ 2 (bilirubin ≥ 2.0 mg/dL)                     | 11 (2%)          | 96 (3%)          | 0.04  |
| Coagulation SOFA score <sup>e</sup>             |                  |                  |       |
| 0 (platelet count ≥ 150 K/mm <sup>3</sup> )     | 408 (78%)        | 2989 (83%)       | 0.12  |
| 1 (platelet count 100-149 K/mm <sup>3</sup> )   | 80 (15%)         | 467 (13%)        | 0.07  |
| ≥ 2 (platelet count < 100 K/mm <sup>3</sup> )   | 33 (6%)          | 144 (4%)         | 0.11  |
| Vasopressor or inotrope use                     | 219 (42%)        | 1482 (41%)       | 0.02  |
| Shock <sup>f</sup>                              | 75 (14%)         | 370 (10%)        | 0.13  |



**Other infections**

|                            |          |           |      |
|----------------------------|----------|-----------|------|
| Bacterial pneumonia        | 85 (16%) | 489 (14%) | 0.08 |
| Bacteremia or endocarditis | 16 (3%)  | 80 (2%)   | 0.05 |

**Laboratory findings**

|                                       |                    |                    |      |
|---------------------------------------|--------------------|--------------------|------|
| White cell count (K/mm <sup>3</sup> ) | 8.2 [5.8-11.6]     | 8.5 [6.1-11.9]     | 0.08 |
| Lymphocyte count (K/mm <sup>3</sup> ) | 9.4 [5.7-14.9]     | 10.0 [6.0-15.1]    | 0.06 |
| Hemoglobin (g/dL)                     | 11.4 [9.5-12.9]    | 12.8 [11.4-14.2]   | 0.63 |
| Platelet count (K/mm <sup>3</sup> )   | 202 [155-258]      | 218 [167-281]      | 0.22 |
| Creatinine (mg/dL)                    | 2.2 [1.5-3.6]      | 1.0 [0.8-1.4]      | 1.56 |
| Albumin (g/dL)                        | 3.1 [2.6-3.5]      | 3.2 [2.8-3.6]      | 0.15 |
| AST (units/L)                         | 48 [33-80]         | 54 [36-85]         | 0.15 |
| ALT (units/L)                         | 28 [18-47]         | 38 [24-62]         | 0.39 |
| Bilirubin (mg/dL)                     | 0.5 [0.3-0.8]      | 0.6 [0.4-0.8]      | 0.26 |
| Lactate (mmol/L)                      | 1.6 [1.0-2.4]      | 1.6 [1.1-2.3]      | 0.07 |
| CRP (mg/L)                            | 142.4 [84.8-217.5] | 151.0 [81.6-235.7] | 0.05 |
| IL-6 (pg/mL)                          | 52.0 [19.0-175.3]  | 56.0 [18.0-156.6]  | 0.02 |
| Arterial pH                           | 7.34 [7.26-7.40]   | 7.38 [7.30-7.44]   | 0.38 |
| Fibrinogen (mg/dL)                    | 588 [442-732]      | 614 [491-764]      | 0.15 |
| D-dimer (ng/mL)                       | 1385 [670-3018]    | 1270 [652-3459]    | 0.01 |
| Ferritin (ng/mL)                      | 984 [450-1981]     | 947 [489-1919]     | 0.01 |
| Troponin T (ng/mL)                    | 51 [25-110]        | 12 [4-40]          | 0.86 |
| Troponin I (ng/mL)                    | 55 [20-170]        | 30 [10-110]        | 0.39 |

Values are n (%) for categorical variables and median [quartile 1 – quartile 3] for continuous variables. An absolute standardized mean difference > 0.1 represents a meaningful difference between groups. Variables with missing values are listed in Supplemental Table S13.

<sup>a</sup> Information on ethnicity and race were abstracted from the electronic health record of each patient. In the U.S., people of Hispanic ethnicity are those of Cuban, Mexican, Puerto Rican, South or Central American, or other Spanish culture or origin regardless of race.

<sup>b</sup> The anti-infective medication categories HCQ or CQ, azithromycin, and HCQ or CQ + azithromycin are not mutually exclusive.

<sup>c</sup> Renal component of the SOFA score was based on serum creatinine levels. Patients who did not have a serum creatinine drawn on ICU day 1 were classified as having a renal SOFA score of 0, and patients on RRT were classified as having a renal SOFA score of 4.<sup>49</sup>

<sup>d</sup> Liver component of the SOFA score. Patients who did not have a serum bilirubin drawn on ICU day 1 were classified as having a liver SOFA score of 0.<sup>49</sup>

<sup>e</sup> Coagulation component of the SOFA score. Patients who did not have a platelet count drawn on ICU day 1 were classified as having a coagulation SOFA score of 0.<sup>49</sup>

<sup>f</sup> Shock is defined as the requirement of ≥ 2 vasopressors or inotropes.

**Abbreviations:** ACE, angiotensin converting enzyme; AKI, acute kidney injury; ALT, alanine aminotransferase; ARB, angiotensin II receptor blocker; AST, aspartate aminotransferase; BMI, body mass index; BP, blood pressure; CKD, chronic kidney disease; COPD, chronic obstructive pulmonary disease; CQ, chloroquine; CRP, C-reactive protein; FiO<sub>2</sub>, fraction of inspired oxygen; HCQ, hydroxychloroquine; ICU, intensive care unit; IL, interleukin; NSAIDs, non-steroidal anti-inflammatory drug; PaO<sub>2</sub>, partial pressure of oxygen; PEEP, positive end-expiratory pressure; RRT, renal replacement therapy; SOFA, Sequential Organ Failure Assessment; U.S., United States.

**Table S5. Standardized differences comparing therapies administered in the first 14 days after ICU admission**

| Therapy                                     | Maintenance dialysis versus non-dialysis CKD | Maintenance dialysis versus without pre-existing CKD | Non-dialysis CKD versus without pre-existing CKD |
|---------------------------------------------|----------------------------------------------|------------------------------------------------------|--------------------------------------------------|
| <b>Anti-infective agent</b>                 |                                              |                                                      |                                                  |
| HCQ or CQ <sup>a</sup>                      | 0.20                                         | 0.23                                                 | 0.03                                             |
| Azithromycin <sup>a</sup>                   | 0.17                                         | 0.21                                                 | 0.04                                             |
| HCQ or CQ + azithromycin <sup>a</sup>       | 0.02                                         | 0.14                                                 | 0.16                                             |
| Remdesivir                                  | 0.23                                         | 0.40                                                 | 0.22                                             |
| Ribavirin                                   | 0.09                                         | 0.09                                                 | 0.00                                             |
| Lopinavir/ritonavir                         | 0.04                                         | 0.04                                                 | 0.08                                             |
| <b>Anti-inflammatory agent</b>              |                                              |                                                      |                                                  |
| Any corticosteroid <sup>b</sup>             | 0.06                                         | 0.03                                                 | 0.03                                             |
| Dexamethasone <sup>b</sup>                  | 0.00                                         | 0.10                                                 | 0.10                                             |
| NSAID                                       | 0.11                                         | 0.24                                                 | 0.14                                             |
| Aspirin                                     | 0.19                                         | 0.49                                                 | 0.30                                             |
| Statin                                      | 0.07                                         | 0.34                                                 | 0.27                                             |
| Tocilizumab                                 | 0.15                                         | 0.28                                                 | 0.12                                             |
| Vitamin C                                   | 0.11                                         | 0.12                                                 | 0.00                                             |
| <b>Respiratory and cardiac intervention</b> |                                              |                                                      |                                                  |
| Invasive mechanical ventilation             | 0.08                                         | 0.15                                                 | 0.07                                             |
| Neuromuscular blockade                      | 0.29                                         | 0.46                                                 | 0.17                                             |
| Inhaled epoprostenol                        | 0.28                                         | 0.27                                                 | 0.02                                             |
| Inhaled nitric oxide                        | 0.05                                         | 0.05                                                 | 0.00                                             |
| Proned positioning                          | 0.06                                         | 0.37                                                 | 0.30                                             |
| ECMO                                        | 0.02                                         | 0.24                                                 | 0.25                                             |
| Vasopressor or inotrope                     | 0.09                                         | 0.10                                                 | 0.02                                             |
| Mechanical cardiac support <sup>c</sup>     | 0.08                                         | 0.09                                                 | 0.01                                             |
| <b>Other</b>                                |                                              |                                                      |                                                  |
| Therapeutic anti-coagulation <sup>d</sup>   | 0.01                                         | 0.03                                                 | 0.03                                             |
| Convalescent serum                          | 0.06                                         | 0.05                                                 | 0.11                                             |

Values presented in the table are absolute standardized mean differences. Dialysis represents pre-existing dialysis-dependent kidney failure.

<sup>a</sup> The anti-infective medication categories HCQ or CQ, azithromycin, and HCQ or CQ + azithromycin are not mutually exclusive.

<sup>b</sup> The anti-inflammatory agent categories any corticosteroid and dexamethasone are not mutually exclusive.

<sup>c</sup> Mechanical cardiac support included an intra-aortic balloon pump, Impella® heart pump, and left and right ventricular assist devices.

<sup>d</sup> Therapeutic anticoagulation included continuous drips of heparin, argatroban, or bivalirudin; subcutaneous enoxaparin (1.5 mg/kg once per day), dalteparin (150-200 units/kg once per day or 100 units/kg twice per day, fondaparinux (≥5 mg per day); oral anticoagulants (e.g. warfarin, apixaban, rivaroxaban, edoxaban, dabigatran).

**Abbreviations:** CKD, chronic kidney disease; CQ, chloroquine; ECMO, extracorporeal membrane oxygenation; HCQ, hydroxychloroquine; ICU, intensive care unit; NSAID, non-steroidal anti-inflammatory drug.

**Table S6. Percentage of 14- and 28-day in-hospital deaths that occurred earlier and later in the study period**

| <i>Admitted to the ICU earlier in the study period – March 4 to April 6, 2020</i> |                                        |                                     |                                              |
|-----------------------------------------------------------------------------------|----------------------------------------|-------------------------------------|----------------------------------------------|
| <b>In-hospital mortality</b>                                                      | <b>Maintenance dialysis<br/>n = 76</b> | <b>Non-dialysis CKD<br/>n = 340</b> | <b>Without pre-existing CKD<br/>n = 2377</b> |
| 14-day                                                                            | 31 (41%)                               | 132 (39%)                           | 581 (24%)                                    |
| 28-day                                                                            | 38 (50%)                               | 177 (52%)                           | 829 (35%)                                    |
| <i>Admitted to the ICU later in the study period – April 7 to May 10, 2020</i>    |                                        |                                     |                                              |
| <b>In-hospital mortality</b>                                                      | <b>Maintenance dialysis<br/>n = 67</b> | <b>Non-dialysis CKD<br/>n = 181</b> | <b>Without pre-existing CKD<br/>n = 1223</b> |
| 14-day                                                                            | 28 (42%)                               | 75 (41%)                            | 295 (24%)                                    |
| 28-day                                                                            | 34 (51%)                               | 88 (49%)                            | 432 (35%)                                    |

Abbreviations: CKD, chronic kidney disease; ICU, intensive care unit.

**Table S7. Association between pre-existing kidney disease and 14-day in-hospital outcomes among critically ill COVID-19 patients**

| <b>Respiratory failure</b>                      |          |                   |                               |                                        |                                        |
|-------------------------------------------------|----------|-------------------|-------------------------------|----------------------------------------|----------------------------------------|
| <b>Patient group</b>                            | <b>n</b> | <b>No. events</b> | <b>Unadjusted HR (95% CI)</b> | <b>Model 1 HR (95% CI)<sup>a</sup></b> | <b>Model 2 HR (95% CI)<sup>b</sup></b> |
| Without pre-existing CKD                        | 1310     | 607               | 1.00 (ref.)                   | 1.00 (ref.)                            | 1.00 (ref.)                            |
| Non-dialysis CKD                                | 208      | 93                | 0.96 (0.78, 1.17)             | 0.96 (0.78, 1.18)                      | 0.95 (0.77, 1.18)                      |
| Maintenance dialysis                            | 63       | 26                | 0.85 (0.59, 1.13)             | 0.88 (0.61, 1.27)                      | 0.87 (0.60, 1.27)                      |
| <b>Shock</b>                                    |          |                   |                               |                                        |                                        |
| <b>Patient group</b>                            | <b>n</b> | <b>No. events</b> | <b>Unadjusted HR (95% CI)</b> | <b>Model 1 HR (95% CI)<sup>a</sup></b> | <b>Model 2 HR (95% CI)<sup>b</sup></b> |
| Without pre-existing CKD                        | 3200     | 851               | 1.00 (ref.)                   | 1.00 (ref.)                            | 1.00 (ref.)                            |
| Non-dialysis CKD                                | 443      | 146               | 1.30 (1.09, 1.54)             | 1.18 (0.99, 1.41)                      | 1.10 (0.91, 1.32)                      |
| Maintenance dialysis                            | 126      | 47                | 1.55 (1.16, 2.08)             | 1.49 (1.10, 2.01)                      | 1.34 (0.98, 1.82)                      |
| <b>Ventricular arrhythmia or cardiac arrest</b> |          |                   |                               |                                        |                                        |
| <b>Patient group</b>                            | <b>n</b> | <b>No. events</b> | <b>Unadjusted HR (95% CI)</b> | <b>Model 1 HR (95% CI)<sup>a</sup></b> | <b>Model 2 HR (95% CI)<sup>b</sup></b> |
| Without pre-existing CKD                        | 3486     | 533               | 1.00 (ref.)                   | 1.00 (ref.)                            | 1.00 (ref.)                            |
| Non-dialysis CKD                                | 500      | 104               | 1.42 (1.15, 1.75)             | 1.23 (0.99, 1.53)                      | 1.15 (0.92, 1.43)                      |
| Maintenance dialysis                            | 136      | 29                | 1.48 (1.09, 2.15)             | 1.40 (0.96, 2.06)                      | 1.25 (0.84, 1.87)                      |
| <b>Thromboembolic event</b>                     |          |                   |                               |                                        |                                        |
| <b>Patient group</b>                            | <b>n</b> | <b>No. events</b> | <b>Unadjusted HR (95% CI)</b> | <b>Model 1 HR (95% CI)<sup>a</sup></b> | <b>Model 2 HR (95% CI)<sup>b</sup></b> |
| Without pre-existing CKD                        | 3487     | 260               | 1.00 (ref.)                   | 1.00 (ref.)                            | --                                     |
| Non-dialysis CKD                                | 504      | 34                | 0.92 (0.64, 1.31)             | 0.90 (0.62, 1.29)                      | --                                     |
| Maintenance dialysis                            | 143      | 8                 | 0.76 (0.38, 1.54)             | 0.71 (0.35, 1.45)                      | --                                     |
| <b>Major bleed</b>                              |          |                   |                               |                                        |                                        |
| <b>Patient group</b>                            | <b>n</b> | <b>No. events</b> | <b>Unadjusted HR (95% CI)</b> | <b>Model 1 HR (95% CI)<sup>a</sup></b> | <b>Model 2 HR (95% CI)<sup>b</sup></b> |
| Without pre-existing CKD                        | 3530     | 98                | 1.00 (ref.)                   | 1.00 (ref.)                            | --                                     |

| Non-dialysis CKD          | 507      | 13                | 0.94 (0.53, 1.68)          | 0.95 (0.54, 1.71)                      | 0.87 (0.48, 1.56)                      |
|---------------------------|----------|-------------------|----------------------------|----------------------------------------|----------------------------------------|
| Maintenance dialysis      | 139      | 6                 | 1.62 (0.71, 3.71)          | 1.80 (0.78, 4.17)                      | 1.52 (0.61, 3.77)                      |
| <b>Acute liver injury</b> |          |                   |                            |                                        |                                        |
| <b>Patient group</b>      | <b>n</b> | <b>No. events</b> | <b>Unadjusted (95% CI)</b> | <b>Model 1 HR (95% CI)<sup>a</sup></b> | <b>Model 2 HR (95% CI)<sup>b</sup></b> |
| Without pre-existing CKD  | 3532     | 163               | 1.00 (ref.)                | 1.00 (ref.)                            | 1.00 (ref.)                            |
| Non-dialysis CKD          | 508      | 18                | 0.76 (0.47, 1.25)          | 0.87 (0.53, 1.43)                      | --                                     |
| Maintenance dialysis      | 142      | 9                 | 1.40 (0.71, 2.74)          | 1.54 (0.78, 3.07)                      | --                                     |

Fine and Gray proportional subdistribution hazards models were used to estimate the association between the presence of pre-existing kidney disease (kidney failure receiving maintenance dialysis and non-dialysis dependent CKD, separately) vs. no pre-existing CKD and 14-day in-hospital outcomes. Death and hospital discharge were treated as competing events. Outcome definitions are listed in Supplemental Table S1.

<sup>a</sup> Model 1 was adjusted for age, sex, race, and Hispanic ethnicity.

<sup>b</sup> Model 2 was adjusted for model 1 covariates plus diabetes, hypertension, coronary artery disease, heart failure, and atrial fibrillation or flutter. Due the low number of event counts and potential for over-adjustment, Model 2 HRs are not presented for thrombotic events, major bleeding events, and acute liver injury.

Abbreviations: CI, confidence interval; CKD, chronic kidney disease; HR, hazard ratio; No., number; ref., referent.

**Table S8. Sensitivity analyses evaluating the association between pre-existing kidney disease and 14-day in-hospital major bleeding and thromboembolic events excluding patients on therapeutic anticoagulation on ICU day 1**

| <b>Thromboembolic event</b> |          |                   |                               |                                        |
|-----------------------------|----------|-------------------|-------------------------------|----------------------------------------|
| <b>Patient group</b>        | <b>n</b> | <b>No. events</b> | <b>Unadjusted HR (95% CI)</b> | <b>Model 1 HR (95% CI)<sup>a</sup></b> |
| Without pre-existing CKD    | 2976     | 221               | 1.00 (ref.)                   | 1.00 (ref.)                            |
| Non-dialysis CKD            | 402      | 28                | 0.95 (0.64, 1.40)             | 0.92 (0.62, 1.37)                      |
| Maintenance dialysis        | 113      | 6                 | 0.73 (0.32, 1.64)             | 0.68 (0.29, 1.55)                      |
| <b>Major bleed</b>          |          |                   |                               |                                        |
| <b>Patient group</b>        | <b>n</b> | <b>No. events</b> | <b>Unadjusted HR (95% CI)</b> | <b>Model 1 HR (95% CI)<sup>a</sup></b> |
| Without pre-existing CKD    | 2967     | 57                | 1.00 (ref.)                   | 1.00 (ref.)                            |
| Non-dialysis CKD            | 403      | 9                 | 1.19 (0.59, 2.40)             | 1.12 (0.55, 2.26)                      |
| Maintenance dialysis        | 110      | 3                 | 1.48 (0.46, 4.77)             | 1.60 (0.48, 5.32)                      |

Fine and Gray proportional subdistribution hazards models were used to estimate the association between the presence of pre-existing kidney disease (kidney failure receiving maintenance dialysis and non-dialysis dependent CKD, separately) vs. no pre-existing CKD and 14-day in-hospital thromboembolic and major bleeding events. Death and hospital discharge were treated as competing events. Patients on therapeutic anticoagulation on ICU day 1 were excluded from these analyses. Outcome definitions are listed in Supplemental Table S1.

<sup>a</sup> Model 1 was adjusted for age, sex, race, and Hispanic ethnicity. Due the low number of event counts and potential for over-adjustment, Model 2 HRs (additionally adjusted for diabetes, hypertension, coronary artery disease, heart failure, and atrial fibrillation or flutter are not presented.

Abbreviations: CI, confidence interval; HR, hazard ratio; No., number; ref., referent.

**Table S9. Sensitivity analyses evaluating the association between pre-existing kidney disease and 14-day in-hospital acute liver injury excluding patients with histories of liver disease**

| <i>Acute liver injury</i> |          |                   |                               |                                        |
|---------------------------|----------|-------------------|-------------------------------|----------------------------------------|
| <b>Patient group</b>      | <b>n</b> | <b>No. events</b> | <b>Unadjusted HR (95% CI)</b> | <b>Model 1 HR (95% CI)<sup>a</sup></b> |
| Without pre-existing CKD  | 3436     | 153               | 1.00 (ref.)                   | 1.00 (ref.)                            |
| Non-dialysis CKD          | 478      | 15                | 0.70 (0.42, 1.20)             | 0.80 (0.45, 1.38)                      |
| Maintenance dialysis      | 135      | 9                 | 1.53 (0.78, 3.01)             | 1.73 (0.87, 3.42)                      |

Fine and Gray proportional subdistribution hazards models were used to estimate the association between the presence of pre-existing kidney disease (kidney failure receiving maintenance dialysis and non-dialysis dependent CKD, separately) vs. no pre-existing CKD and 14-day in-hospital acute liver injury. Death and hospital discharge were treated as competing events. Patients with chronic liver disease were excluded from these analyses. Outcome definitions are listed in Supplemental Table S1.

<sup>a</sup> Model 1 was adjusted for age, sex, race, and Hispanic ethnicity. Due the low number of event counts and potential for over-adjustment, Model 2 HRs (additionally adjusted for diabetes, hypertension, coronary artery disease, heart failure, and atrial fibrillation or flutter are not presented.

Abbreviations: CI, confidence interval; HR, hazard ratio; No., number; ref., referent.

**Table S10. Association between baseline serum creatinine and 14- and 28-day in-hospital mortality among critically ill non-dialysis dependent CKD patients with COVID-19**

| <b>14-day in-hospital mortality</b> |          |                   |                               |                                        |
|-------------------------------------|----------|-------------------|-------------------------------|----------------------------------------|
| <b>Baseline creatinine</b>          | <b>n</b> | <b>No. events</b> | <b>Unadjusted HR (95% CI)</b> | <b>Model 1 HR (95% CI)<sup>a</sup></b> |
| < 1.2 mg/dL                         | 72       | 25                | 1.00 (ref.)                   | 1.00 (ref.)                            |
| 1.2 – 1.9 mg/dL                     | 229      | 83                | 1.05 (0.68, 1.63)             | 0.99 (0.63, 1.54)                      |
| ≥ 2.0 mg/dL                         | 96       | 39                | 1.22 (0.75, 2.00)             | 1.26 (0.77, 2.05)                      |
| <b>28-day in-hospital mortality</b> |          |                   |                               |                                        |
| <b>Baseline creatinine</b>          | <b>n</b> | <b>No. events</b> | <b>Unadjusted HR (95% CI)</b> | <b>Model 1 HR (95% CI)<sup>a</sup></b> |
| < 1.2 mg/dL                         | 72       | 34                | 1.00 (ref.)                   | 1.00 (ref.)                            |
| 1.2 – 1.9 mg/dL                     | 229      | 107               | 0.99 (0.68, 1.44)             | 0.96 (0.65, 1.41)                      |
| ≥ 2.0 mg/dL                         | 96       | 52                | 1.21 (0.79, 1.85)             | 1.26 (0.83, 1.91)                      |

Of the 521 non-dialysis dependent CKD patients, 397 had a baseline serum creatinine measurement 7 to 365 days prior to hospital admission recorded in their electronic health care record. Fine and Gray proportional subdistribution hazards models were used to estimate the association between baseline serum creatinine and 14- and 28-day in-hospital mortality. Hospital discharge was treated as a competing event.

<sup>a</sup> Model 1 was adjusted for age, sex, race, and Hispanic ethnicity. Due the low number of event counts and potential for over-adjustment, Model 2 HRs (additionally adjusted for diabetes, hypertension, coronary artery disease, heart failure, and atrial fibrillation or flutter are not presented.

Abbreviations: CI, confidence interval; CKD, chronic kidney disease; HR, hazard ratio; No., number; ref., referent.



**Table S11. Association between vascular access type and 14- and 28-day in-hospital mortality among critically ill hemodialysis patients with COVID-19**

| <b>14-day in-hospital mortality</b> |          |                   |                               |                                        |
|-------------------------------------|----------|-------------------|-------------------------------|----------------------------------------|
| <b>Catheter access</b>              | <b>n</b> | <b>No. events</b> | <b>Unadjusted HR (95% CI)</b> | <b>Model 1 HR (95% CI)<sup>a</sup></b> |
| No                                  | 93       | 33                | 1.00 (ref.)                   | 1.00 (ref.)                            |
| Yes                                 | 35       | 19                | 1.92 (1.10, 3.36)             | 2.26 (1.24, 4.11)                      |
| <b>28-day in-hospital mortality</b> |          |                   |                               |                                        |
| <b>Catheter access</b>              | <b>n</b> | <b>No. events</b> | <b>Unadjusted HR (95% CI)</b> | <b>Model 1 HR (95% CI)<sup>a</sup></b> |
| No                                  | 93       | 42                | 1.00 (ref.)                   | 1.00 (ref.)                            |
| Yes                                 | 35       | 20                | 1.61 (0.94, 2.78)             | 1.94 (1.09, 3.44)                      |

A total of 128 hemodialysis patients were included in these analyses. Fine and Gray proportional subdistribution hazards models were used to estimate the association between vascular access type and 14- and 28-day in-hospital mortality. Hospital discharge was treated as a competing event.

<sup>a</sup> Model 1 was adjusted for age, sex, race, and Hispanic ethnicity. Due the low number of event counts and potential for over-adjustment, Model 2 HRs (additionally adjusted for diabetes, hypertension, coronary artery disease, heart failure, and atrial fibrillation or flutter are not presented.

Abbreviations: CI, confidence interval; HR, hazard ratio; No., number; ref., referent.

**Table S12. Association between dialysis vintage and 14- and 28-day in-hospital mortality among critically ill hemodialysis patients with COVID-19**

| <b>14-day in-hospital mortality</b> |          |                   |                               |                                        |
|-------------------------------------|----------|-------------------|-------------------------------|----------------------------------------|
| <b>Vintage</b>                      | <b>n</b> | <b>No. events</b> | <b>Unadjusted HR (95% CI)</b> | <b>Model 1 HR (95% CI)<sup>a</sup></b> |
| ≥ 5.0 years                         | 52       | 16                | 1.00 (ref.)                   | 1.00 (ref.)                            |
| < 5.0 years                         | 52       | 26                | 1.77 (0.96, 3.26)             | 1.56 (0.83, 2.96)                      |
| <b>28-day in-hospital mortality</b> |          |                   |                               |                                        |
| <b>Vintage</b>                      | <b>n</b> | <b>No. events</b> | <b>Unadjusted HR (95% CI)</b> | <b>Model 1 HR (95% CI)<sup>a</sup></b> |
| ≥ 5.0 years                         | 52       | 20                | 1.00 (ref.)                   | 1.00 (ref.)                            |
| < 5.0 years                         | 52       | 30                | 1.70 (0.98, 2.96)             | 1.53 (0.85, 2.76)                      |

Of the 128 hemodialysis patients, 24 had an unknown dialysis vintage and were excluded from these analyses. Fine and Gray proportional subdistribution hazards models were used to estimate the association between dialysis vintage and 14- and 28-day in-hospital mortality. Hospital discharge was treated as a competing event.

<sup>a</sup> Model 1 was adjusted for age, sex, race, and Hispanic ethnicity. Due the low number of event counts and potential for over-adjustment, Model 2 HRs (additionally adjusted for diabetes, hypertension, coronary artery disease, heart failure, and atrial fibrillation or flutter are not presented.

Abbreviations: CI, confidence interval; HR, hazard ratio; No., number; ref., referent.

**Table S13. ICU day 1 variables with missing data**

| Variables with missing data              | All patients<br>N = 4264 |
|------------------------------------------|--------------------------|
| BMI                                      | 185 (4%)                 |
| Days from symptom onset to ICU admission | 4 (0%)                   |
| White cell count                         | 202 (5%)                 |
| Lymphocyte count                         | 796 (19%)                |
| Hemoglobin                               | 201 (5%)                 |
| Platelet count                           | 204 (5%)                 |
| Creatinine                               | 165 (4%)                 |
| Albumin                                  | 784 (18%)                |
| AST                                      | 764 (18%)                |
| ALT                                      | 742 (17%)                |
| Bilirubin                                | 753 (18%)                |
| Lactate                                  | 1569 (37%)               |
| CRP                                      | 1599 (38%)               |
| IL-6                                     | 3451 (81%)               |
| Arterial pH                              | 1290 (30%)               |
| Fibrinogen                               | 3388 (79%)               |
| D-dimer                                  | 1926 (45%)               |
| Ferritin                                 | 1741 (41%)               |
| Troponin T                               | 3423 (80%)               |
| Troponin I                               | 2731 (64%)               |

Values presented are n (%). Of the 2 675 patients receiving invasive mechanical ventilation on ICU day 1, PEEP was missing for 291 (11%) of patients, and PaO<sub>2</sub>:FiO<sub>2</sub> ratio was missing for 466 (17%) patients.

Abbreviations: ALT, alanine aminotransferase; AST, aspartate aminotransferase; BMI, body mass index; CRP, C-reactive protein; ICU, intensive care unit; IL, interleukin.
